# Supplementary material
Source: Springer Nature journal article supplement (https://www.springermedizin.de/resource/supplementary/12885_2012_3251_MOESM15_ESM.pdf/9463044)

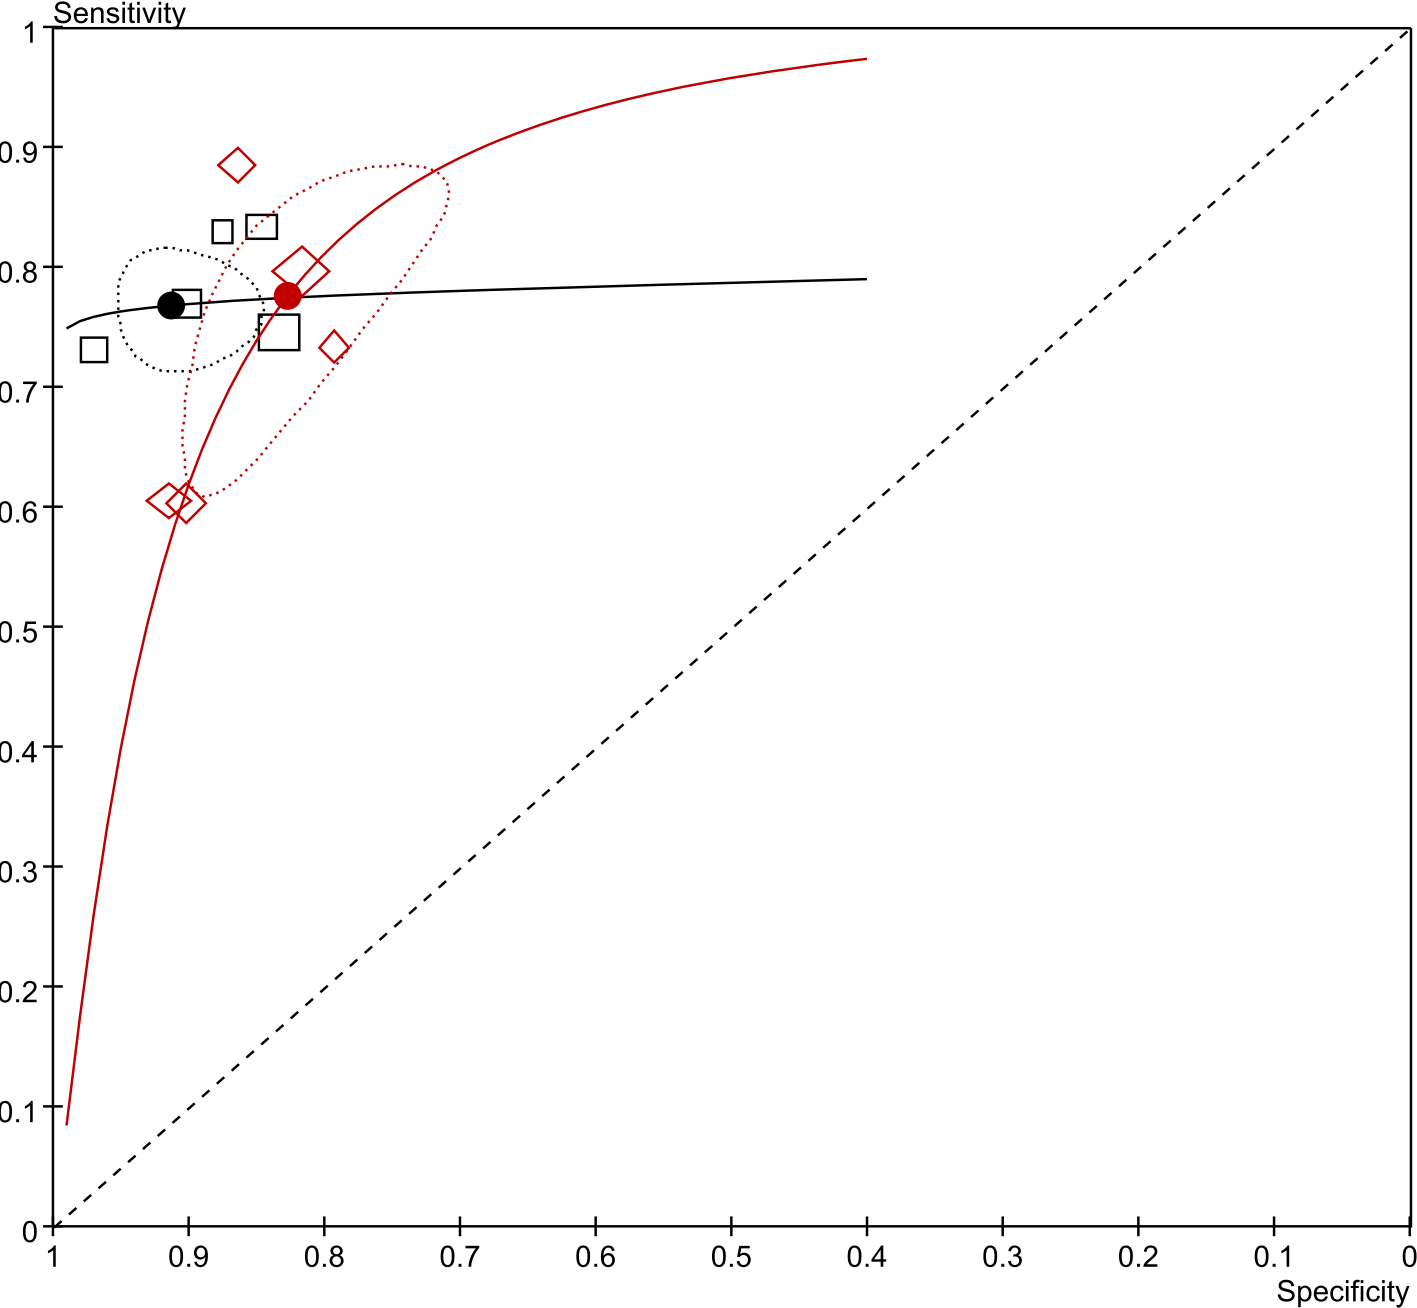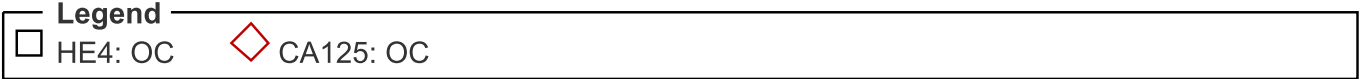

Supplement: MOESM15 [file 9463044]
